# Supplementary figures and images for: Modeling chronic myeloid leukemia in immunodeficient mice reveals expansion of aberrant mast cells and accumulation of pre-B cells
Source: PubMed Central journal article supplement — Blood Cancer J. 2014 Dec 12;4(12):e269–. doi: 10.1038/bcj.2014.89 (PMC4315895; doi:10.1038/bcj.2014.89), 2014-12-12

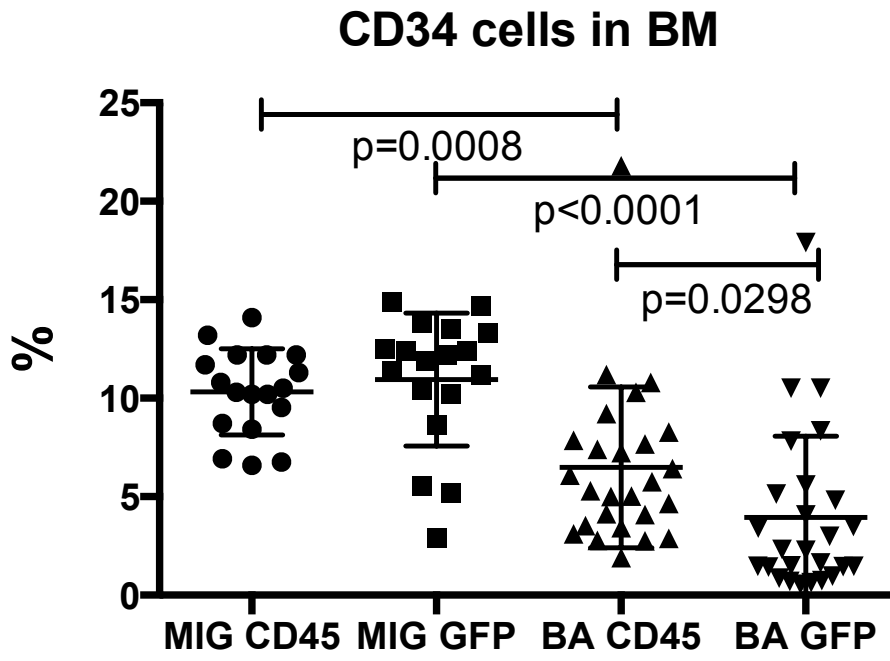

Supplement: bcj201489x1.pdf [file bcj201489x1.pdf]
